# Supplementary material
Source: publisher figshare collection journal article supplement (https://geolsoc.figshare.com/ndownloader/files/6902060)
Supplement: Supplementary file 1 [file 6902060]

## Sheet: Table 4.
Table 4.
Ion microprobe U-Th-Pb age data for rutile from sample SH12-014
Grain spot		207Pb /206Pb	±%	%c206		U (ppm)	Th (ppm)		238U/206Pb*	±%	207Pb*/206Pb*	±%	207Pb*/235U	±%	206Pb*/238U	±%	err corr		206Pb/238U Age	1 s	207Pb/235U Age	1 s	Disc. (%)
1		0.197939	4.97669	16.3952		9.2054	0.00717575		12.535	10.4781	0.0660954	17.3965	0.727022	18.523	0.0797765	10.4781	0.387081		494.789	49.9049	554.804	49.9049	12.1294
2.1		0.196686	8.32313	16.338		11.3076	0.037573		15.4558	9.53131	0.0664437	28.4082	0.592738	30.0939	0.0647005	9.53131	0.33026		404.149	37.338	--	--
3		0.294856	3.018	28.3595		3.9189	0.0062206		13.5429	18.7482	0.0677716	20.0275	0.689979	19.2899	0.0738393	18.7482	0.445864		459.245	83.1045	378.087	241.953	-17.6719
4		0.459664	5.59374	49.1609		10.1879	0.0261077		13.8874	40.9484	0.062837	75.204	0.623874	80.6673	0.0720079	40.9484	0.382712		448.241	177.312	452.213	173.791	0.886094
5		0.314312	3.8845	29.9217		6.47556	0.00685781		15.6404	22.066	0.0795582	23.5691	0.701356	22.7462	0.063937	22.066	0.447079		399.524	85.4827	517.06	297.174	29.4188
6		0.199633	4.74951	18.4888		6.60751	0.00384948		14.6883	18.2505	0.048668	25.6494	0.45685	24.6867	0.0680814	18.2505	0.315861		424.586	74.9922	--	--
7		0.14892	4.7931	11.7304		8.64336	0.00548393		14.7054	9.09912	0.0537897	15.3706	0.50434	16.1614	0.0680022	9.09912	0.366294		424.109	37.3481	378.449	612.67	-10.7661
8		1.70652	4.00921	--		0.831031	0.164408		--	--	--	--	2157.11	133.578	0	--	0.783552		--	--	400.562	76.4565
9		0.341764	3.75835	34.4147		6.49881	0.10749		15.2572	18.8534	0.0671045	26.2513	0.606427	29.7914	0.0655429	18.8534	0.493036		409.247	74.7588	498.829	328.065	21.8893
10		-0.444444	64.5497	-84.5363		0.969081	0.634051		-9.7701	-53.5342	0.141954	122.939	-2.00332	-145.425	-0.102353	-53.5342	0.571606		-696.074	393.5	459.375	45.4992	-165.995
11		0.545805	2.64338	60.5009		4.26835	0.0213906		17.5664	79.6628	0.0574787	81.6838	0.451155	63.9939	0.0569268	79.6628	0.369674		356.909	276.596	582.306	107.418	63.1527
12		0.322476	5.93764	31.6109		3.45437	0.0201528		18.1659	23.5122	0.0739199	33.8341	0.561055	38.4312	0.0550482	23.5122	0.489727		345.44	79.0829	472.615	142.228	36.8151
13		0.307245	9.14024	29.7721		4.96205	0.00998921		14.5947	28.3241	0.070285	54.9426	0.664003	57.4739	0.0685182	28.3241	0.333809		427.222	117.084	428.531	68.7431	0.306367
14		1.12883	15.0442	139.252		3.0051	2.96541		-3.35166	-363.51	0.0886134	582.27	-3.64537	-742.119	-0.29836	-363.51	0.637293		-2284.19	9964.62	451.767	61.3658	-119.778
15		0.441916	7.641	48.1535		6.62653	0.276278		12.3108	43.2996	0.040328	149.507	0.451671	161.89	0.0812296	43.2996	0.408766		503.458	209.7	403.953	94.3462	-19.7644
16		0.160884	5.23295	13.3329		12.9501	0.02561		15.0174	8.25001	0.0526755	18.6592	0.483632	19.0873	0.0665893	8.25001	0.267427		415.575	33.2032	427.285	56.5099	2.81792
17		0.372294	7.28492	38.1628		5.44969	0.0480144		14.5508	24.0419	0.0669487	55.6416	0.634393	65.7671	0.068725	24.0419	0.57152		428.469	99.6632	250.333	94.2934	-41.5751
18		0.121814	3.63586	8.05386		7.59153	0.0254817		13.6269	6.36278	0.056542	9.1076	0.572105	9.90459	0.0733844	6.36278	0.441423		456.513	28.0423	461.484	159.971	1.08882
19		0.235106	5.10984	19.0902		8.1809	0.0144934		15.4499	12.5848	0.0867786	16.2654	0.774439	18.447	0.0647252	12.5848	0.504209		404.298	49.3173	504.428	62.8156	24.7664
20		0.11182	7.39485	6.66875		11.1415	0.0115842		15.2599	6.95587	0.0581121	15.2391	0.525068	16.0416	0.0655311	6.95587	0.329293		409.175	27.5772	386.343	92.394	-5.58016
21		0.117124	5.20016	7.91737		13.0929	0.0179663		12.9179	6.95274	0.0525007	12.6941	0.560369	13.5835	0.0774119	6.95274	0.379655		480.656	32.2033	411.481	35.6673	-14.3919
22		0.132086	8.41078	9.587		8.35195	0.0199026		15.3932	8.63873	0.0545478	22.2688	0.488595	23.3558	0.0649637	8.63873	0.307833		405.742	33.9707	450.984	143.007	11.1505
23		0.13428	4.8462	9.09803		12.9076	0.0195715		16.1952	8.50601	0.061454	12.0448	0.523198	13.2253	0.0617467	8.50601	0.454171		386.24	31.8887	532.788	102.774	37.9424
24		0.212557	4.33515	21.7444		7.07985	0.0615428		15.6087	13.2873	0.0316511	36.9371	0.279591	37.6672	0.0640667	13.2873	0.230794		400.31	51.5724	468.753	128.376	17.0976
25		0.261635	6.10282	24.8502		8.33843	0.0302301		14.8644	15.872	0.0620293	29.2684	0.575374	34.6645	0.0672748	15.872	0.542452		419.716	64.4949	-74.2487	480.56	-117.69
26		0.206858	2.97403	16.7613		7.37847	0.00628007		16.0341	14.7876	0.0748247	13.6672	0.643431	12.4528	0.0623671	14.7876	0.507624		390.005	55.9625	870.281	118.636	123.146
27		0.151043	6.72692	12.3726		7.92849	0.00968561		14.991	10.0077	0.0503398	22.586	0.463001	23.915	0.0667067	10.0077	0.33835		416.284	40.3436	493.609	91.1817	18.5751
28		0.107058	3.28573	6.65486		18.4352	0.0440646		14.6371	5.98494	0.0530443	8.00852	0.499672	8.66804	0.0683196	5.98494	0.451235		426.024	24.673	430.508	122.7	1.05246
29		0.20446	6.78825	18.4363		8.78297	0.31699		13.4288	7.23988	0.0544601	31.042	0.559167	31.7099	0.0744667	7.23988	0.205448		463.01	32.3459	472.63	40.9514	2.07766
30		0.196759	7.4448	16.4127		7.07999	0.00869744		15.4714	10.2085	0.0658322	25.6325	0.586692	27.3866	0.0646355	10.2085	0.352705		403.755	39.953	492.272	397.103	21.9235
31		0.352892	8.50522	41.3101		2.86414	0.0264327		15.4512	28.3992	-0.00790202	661.581	-0.0705143	-647.23	0.0647199	28.3992	0.489022		404.266	111.282	539.601	122.739	33.4767
32		0.330155	3.13928	27.5701		4.21664	0.0213319		12.6407	19.1126	0.124345	14.9252	1.35631	13.6319	0.0791096	19.1126	0.630147		490.806	90.3236	382.065	94.3191	-22.1556
33		0.295843	2.96687	28.477		5.49044	0.0305588		15.2758	18.4462	0.0693565	15.6819	0.626013	18.4725	0.0654629	18.4462	0.639142		408.763	73.0603	414.636	67.0112	1.4369
34		0.192421	6.32603	17.1738		11.7167	0.042894		13.7063	11.8551	0.052491	27.4052	0.52804	28.5013	0.0729592	11.8551	0.298657		453.96	51.9659	7795.08	10412.5	1617.13
35		0.119767	2.86305	7.94721		23.7629	0.0202545		12.8123	8.61453	0.0550817	8.99497	0.592761	8.66458	0.0780497	8.61453	0.458029		484.471	40.2052	481.304	143.388	-0.653664
Ion microprobe data. Disc. (%) is the age discordance as defined = 100 × [(207Pb/235U)-(206Pb/238U)/(206Pb/238U)] All errors are 1-sigma. Error in standard calibration was 1.05%. Common Pb corrected by assuming 206Pb/235U - 208Pb/232Th age concordance. Grain spot is the individual grain and analysis identification. (--) indicates no value measured or calculated
